# Supplementary material for: Endurance exercise ameliorates Western diet–induced atherosclerosis through modulation of microbiota and its metabolites
Source: PubMed Central journal article supplement (PMC8901804; doi:10.1038/s41598-022-07317-x), 2022-03-07

# Figure 6

VCAM-1

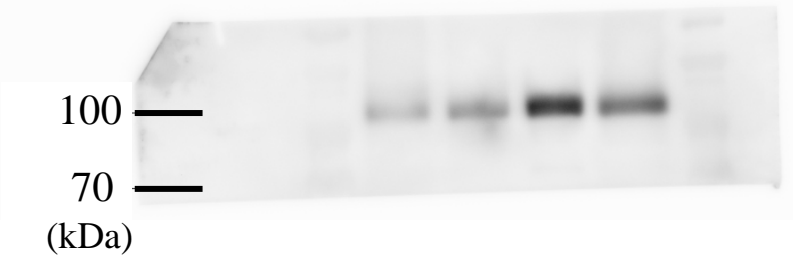

MCP-1

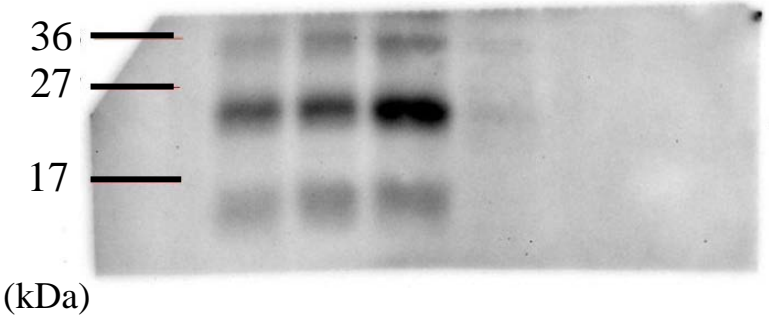

IL-1 beta

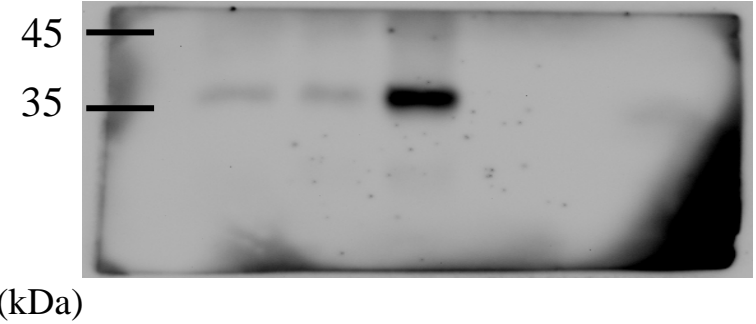

TNF- $\alpha$

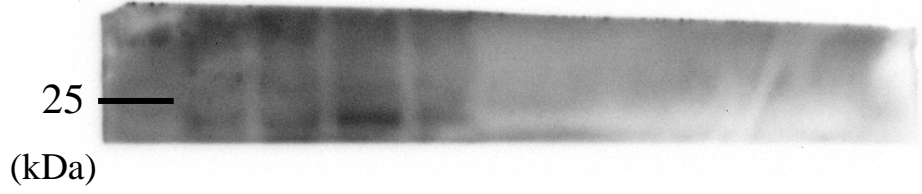

Beta-actin

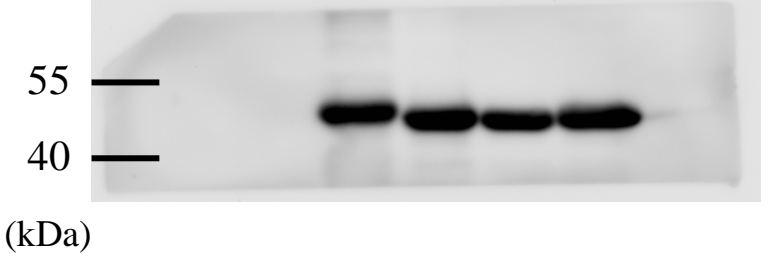

Supplement: 41598_2022_7317_MOESM1_ESM.pdf [file 41598_2022_7317_MOESM1_ESM.pdf]
